# Supplementary material
Source: Royal Society of Chemistry journal article supplement (doi:10.1039/d5ma01435b)
Supplement: d5ma01435b1.pdf [file d5ma01435b1.pdf]

## Supplementary Information

### **Solution-processed La-substituted Ba<sub>2</sub>Bi<sub>2</sub>O<sub>6</sub> photocathodes with enhanced photoelectrochemical activity: a combined experimental and computational study**

Bradley Francis Lewis<sup>a</sup>, Giuseppe Mallia<sup>b</sup>, Tianhao Lan<sup>c</sup>, Evan Tillotson<sup>d,e</sup>, Minzhi Chen<sup>a</sup>, Hongbo Zhang<sup>a</sup>, Jamie Southouse<sup>f</sup>, Sarah J. Haigh<sup>d,e</sup>, Nicholas M. Harrison<sup>b</sup>, Ji-Seon Kim<sup>c,g,h</sup> and Salvador Eslava<sup>a\*</sup>

<sup>a</sup> Department of Chemical Engineering and Centre for Processable Electronics, Imperial College London, London, SW7 2AZ, United Kingdom

<sup>b</sup> Department of Chemistry, Imperial College London, London, W12 0BZ, United Kingdom

<sup>c</sup> Department of Physics and Centre for Processable Electronics, Imperial College London, London, SW7 2AZ, United Kingdom

<sup>d</sup> Department of Materials, University of Manchester, Manchester M13 9PL, United Kingdom

<sup>e</sup> National Graphene Institute, University of Manchester, Manchester M13 9PL, United Kingdom

<sup>f</sup> BP Innovation & Engineering, Applied Sciences, BP plc, Saltend, Hull, HU12 8DS, United Kingdom

<sup>g</sup> Department of Chemistry, University of Oxford, South Parks Road, Oxford, OX1 3QZ, United Kingdom

<sup>h</sup> Department of Physics, Ewha Womans University, Seoul 03760, Republic of Korea

\* E-mail: [s.eslava@imperial.ac.uk](mailto:s.eslava@imperial.ac.uk)

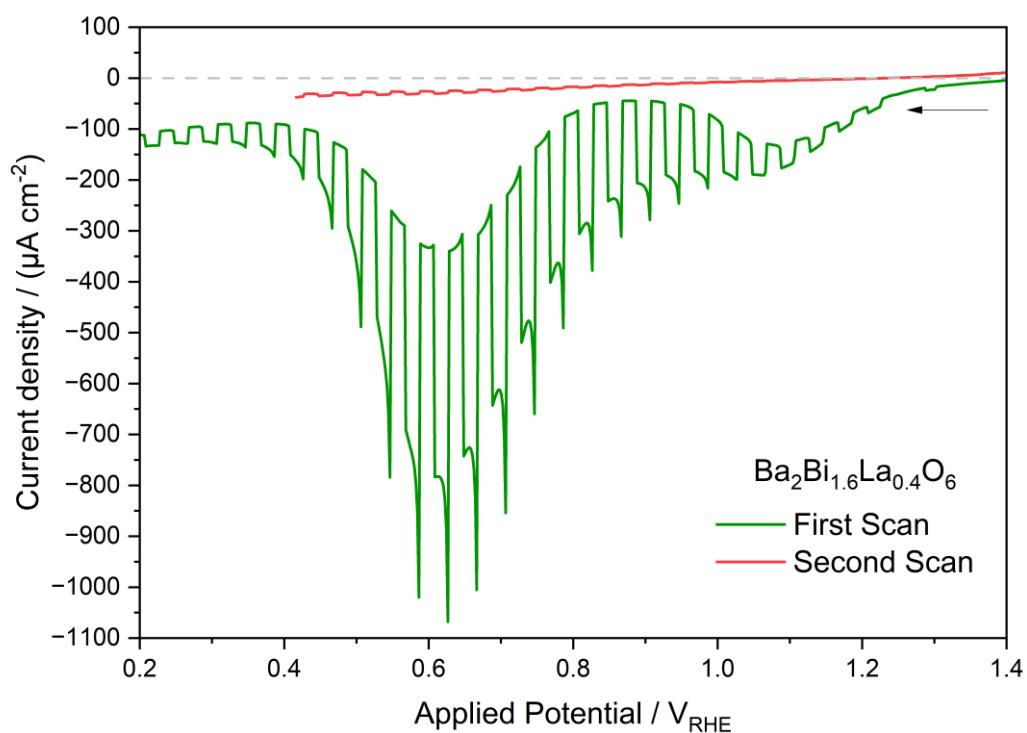

**Figure S1:** Comparison of first and second current–potential curves for  $Ba_2Bi_{1.6}La_{0.4}O_6$  under chopped simulated sunlight ( $AM1.5G$ ,  $100\text{ mW cm}^{-2}$ ) in  $pH\ 12\ 0.1\ M\ Na_2SO_4$ . Linear sweep from  $+1.4$  to  $+0.2\ V_{RHE}$  at  $10\text{ mV s}^{-1}$ .

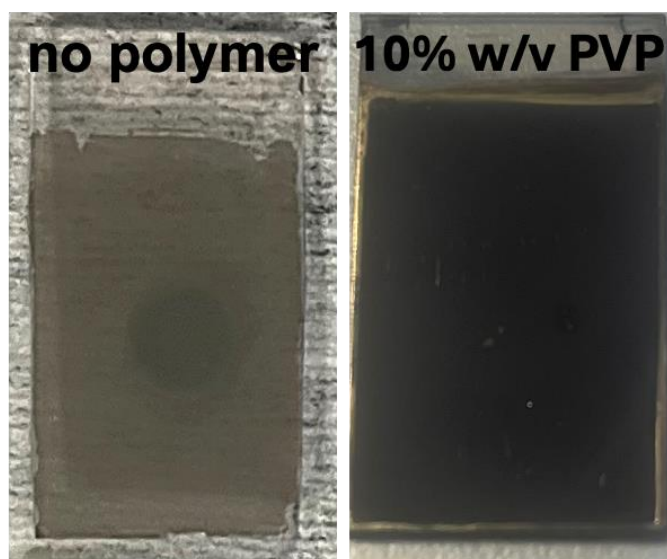

**Figure S2:** Images of  $Ba_2Bi_2O_6$  thin films fabricated (left) polymer free and (right) with  $10\% \text{ w/v PVP}$ .

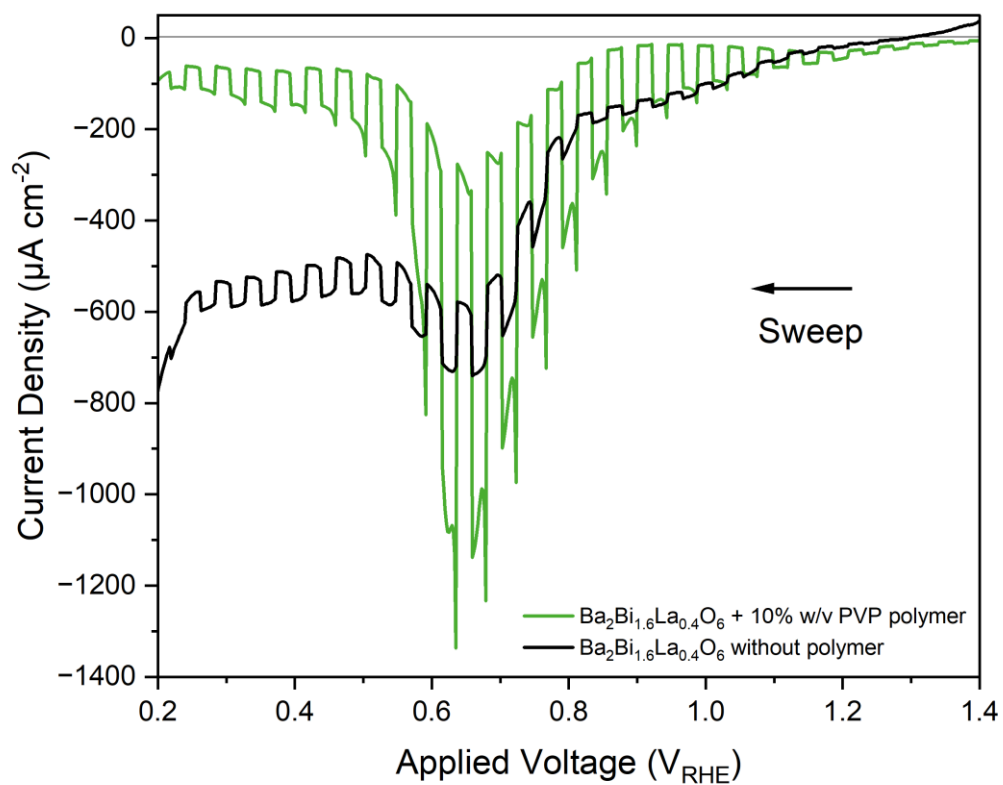

**Figure S3:** Current–potential curves for  $Ba_2Bi_{1.6}La_{0.4}O_6$  films with and without polymer templates under chopped simulated sunlight ( $AM1.5G$ ,  $100\text{ mW cm}^{-2}$ ) in  $pH\ 12\ 0.1\ M\ Na_2SO_4$ . Linear sweep from  $+1.2$  to  $+0.2\ V_{RHE}$  at  $10\text{ mV s}^{-1}$ .

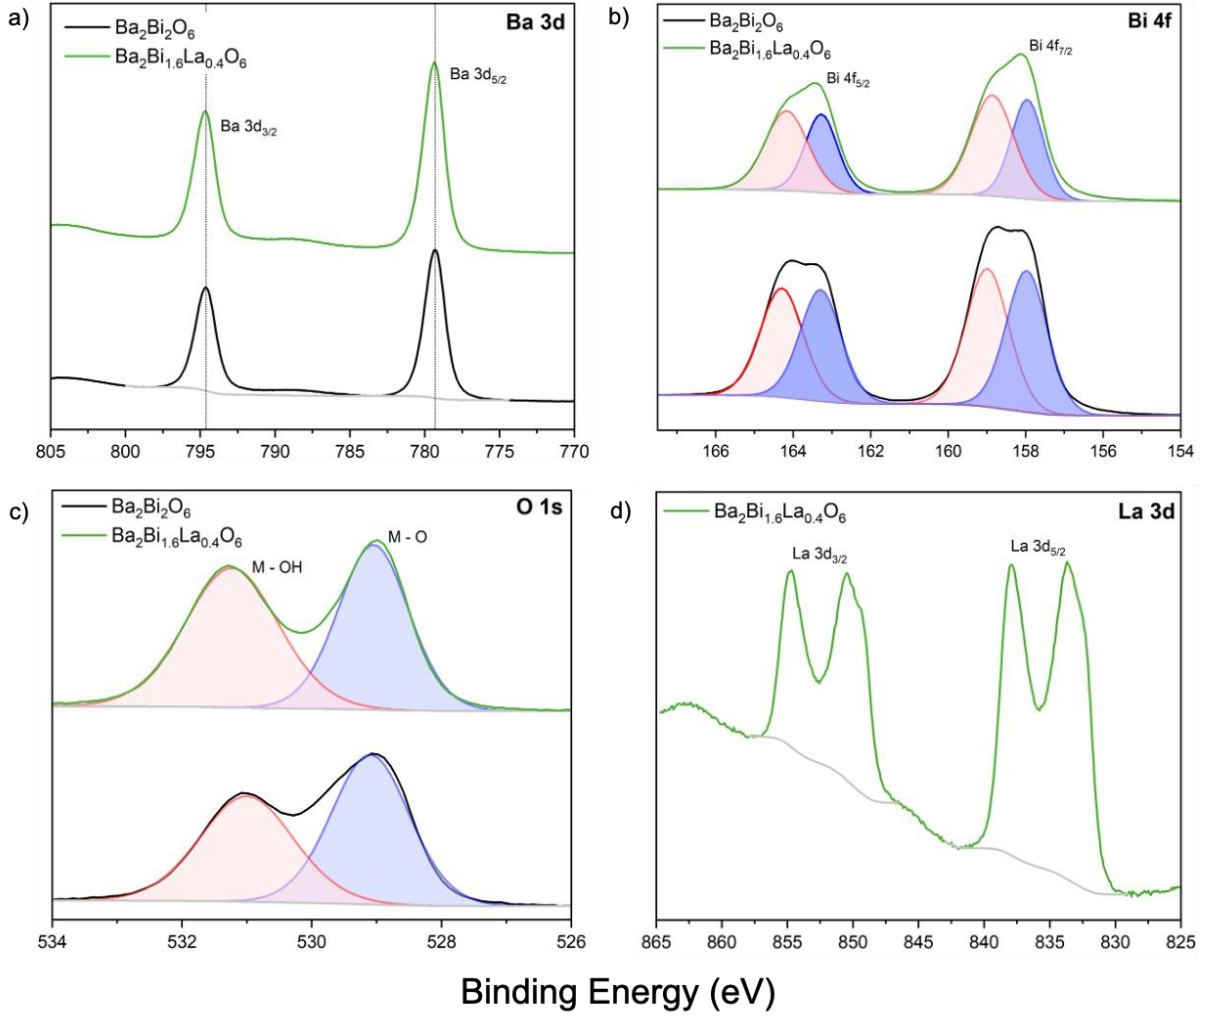

**Figure S4:** a) Ba 3d , b) Bi 2p , c) O 1s , and d) La 3d X-ray photoemission spectra of  $Ba_2Bi_2O_6$  and  $Ba_2Bi_{1.6}La_{0.4}O_6$  thin films.

**Table S1:** XPS surface elemental percentages of Ba, Bi, O and La atoms on  $Ba_2Bi_2O_6$  and  $Ba_2Bi_{1.6}La_{0.4}O_6$  thin films.

| Compound                  | Ba [at. %] |          | Bi [at. %] |          | La [at. %] |          | O [at. %] |          |
|---------------------------|------------|----------|------------|----------|------------|----------|-----------|----------|
|                           | XPS        | Expected | XPS        | Expected | XPS        | Expected | XPS       | Expected |
| $Ba_2Bi_2O_6$             | 21.5       | 20       | 6.2        | 20       | -          | -        | 72.3      | 60       |
| $Ba_2Bi_{1.6}La_{0.4}O_6$ | 21.0       | 20       | 8          | 14       | 1.7        | 6        | 69.2      | 60       |

**Table S2:** Basis sets for each of the atoms used in computational results.

| Atom       | Link                                                                                                                                                                                    |
|------------|-----------------------------------------------------------------------------------------------------------------------------------------------------------------------------------------|
| <b>Ba</b>  | <a href="https://www.crystal.unito.it/Basis_Sets/barium.html#Ba_m-S-RSC_Heyd_2005">https://www.crystal.unito.it/Basis_Sets/barium.html#Ba_m-S-RSC_Heyd_2005</a>                         |
| <b>Bi</b>  | <a href="https://www.crystal.unito.it/Basis_Sets/bismuth.html#Bi_weihrich_2006">https://www.crystal.unito.it/Basis_Sets/bismuth.html#Bi_weihrich_2006</a>                               |
| <b>La</b>  | <a href="https://www.crystal.unito.it/Basis_Sets/lanthanum.html#La_9761111sp-631d_Towler_1996">https://www.crystal.unito.it/Basis_Sets/lanthanum.html#La_9761111sp-631d_Towler_1996</a> |
| <b>O *</b> | <a href="https://www.crystal.unito.it/Basis_Sets/oxygen.html#O_8-411_towler_1994">https://www.crystal.unito.it/Basis_Sets/oxygen.html#O_8-411_towler_1994</a>                           |

O \* The oxygen basis set has been improved by adding additional d-shells. Each has a single gaussian function with the following exponents (1.0 and 0.4 bohr<sup>-2</sup>).
